# Supplementary material for: Knockdown of Lamin B1 and the Corresponding Lamin B Receptor Leads to Changes in Heterochromatin State and Senescence Induction in Malignant Melanoma
Source: MDPI journal article supplement (doi:10.3390/cells11142154), 2022-07-08
Supplement: s1 [file s1]

A

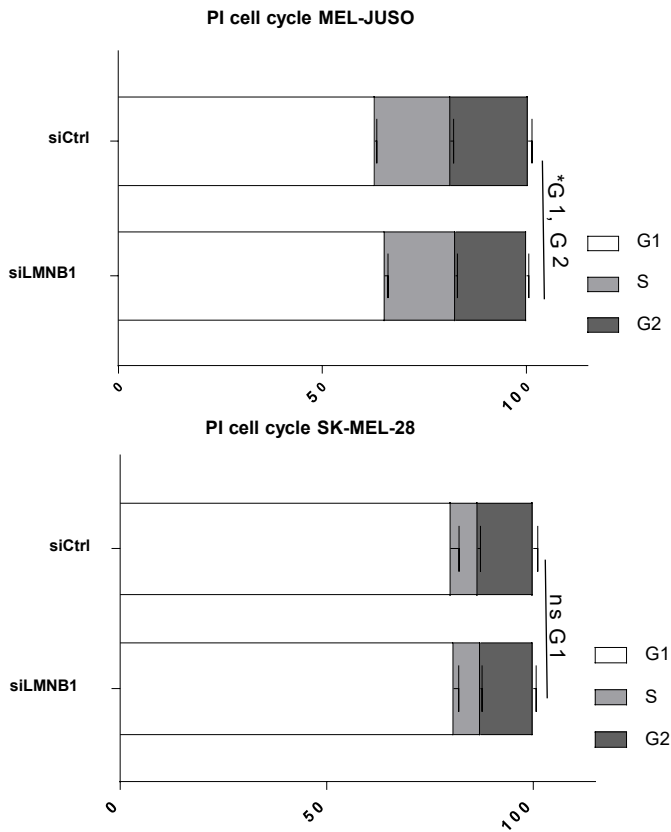

| MEL-JUSO |     | G1 %      | S/G2 %    |
|----------|-----|-----------|-----------|
| siCtrl   | n=1 | 63.774115 | 36.225885 |
|          | n=2 | 62.03925  | 37.96075  |
|          | n=3 | 62.907175 | 38.61691  |
| siLMNB1  | n=1 | 66.759865 | 33.24013  |
|          | n=2 | 63.682495 | 36.317505 |
|          | n=3 | 65.39983  | 34.60017  |

| SK-MEL-28 |     | G1 %       | S/G2 %     |
|-----------|-----|------------|------------|
| siCtrl    | n=1 | 84.0262916 | 15.9737085 |
|           | n=2 | 78.6462662 | 21.3537339 |
|           | n=3 | 77.6485098 | 22.3514903 |
| siLMNB1   | n=1 | 82.9967854 | 17.0032146 |
|           | n=2 | 79.1606754 | 20.8393247 |
|           | n=3 | 80.344609  | 19.6553912 |

B

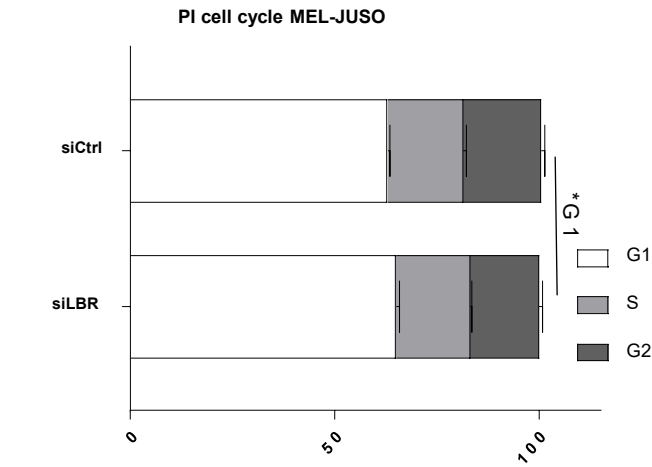

| MEL-JUSO |     | G1 %      | S/G2 %     |
|----------|-----|-----------|------------|
| siCtrl   | n=1 | 63.774115 | 36.225885  |
|          | n=2 | 62.03925  | 37.96075   |
|          | n=3 | 62.907175 | 37.0928272 |
| siLBR    | n=1 | 66.2519   | 33.748095  |
|          | n=2 | 65.14242  | 34.857585  |
|          | n=3 | 63.80766  | 36.19234   |

**Figure S1: (A)** Flow Cytometry with the fluorescent dye propidium iodide for cell cycle staining. MEL-JUSO and SK-MEL-28 treated with siLMNB1 and siCtrl for 72 h. Table show the percentage of cells in cell cycle phase respectively. **(B)** Flow Cytometry with the fluorescent dye propidium iodide for cell cycle staining. MEL-JUSO treated with siLBR and siCtrl for 72 h. Table show the percentage of cells in cell cycle phase respectively. (2way ANOVA and subsequent Uncorrected Fisher’s LSD Test). Bars represent mean±SEM (\*= p≤ 0.05 and ns = not significant))
