# Supplementary material for: Knockdown of Lamin B1 and the Corresponding Lamin B Receptor Leads to Changes in Heterochromatin State and Senescence Induction in Malignant Melanoma
Source: MDPI journal article supplement (doi:10.3390/cells11142154), 2022-07-08
Supplement: s1 [file s1]

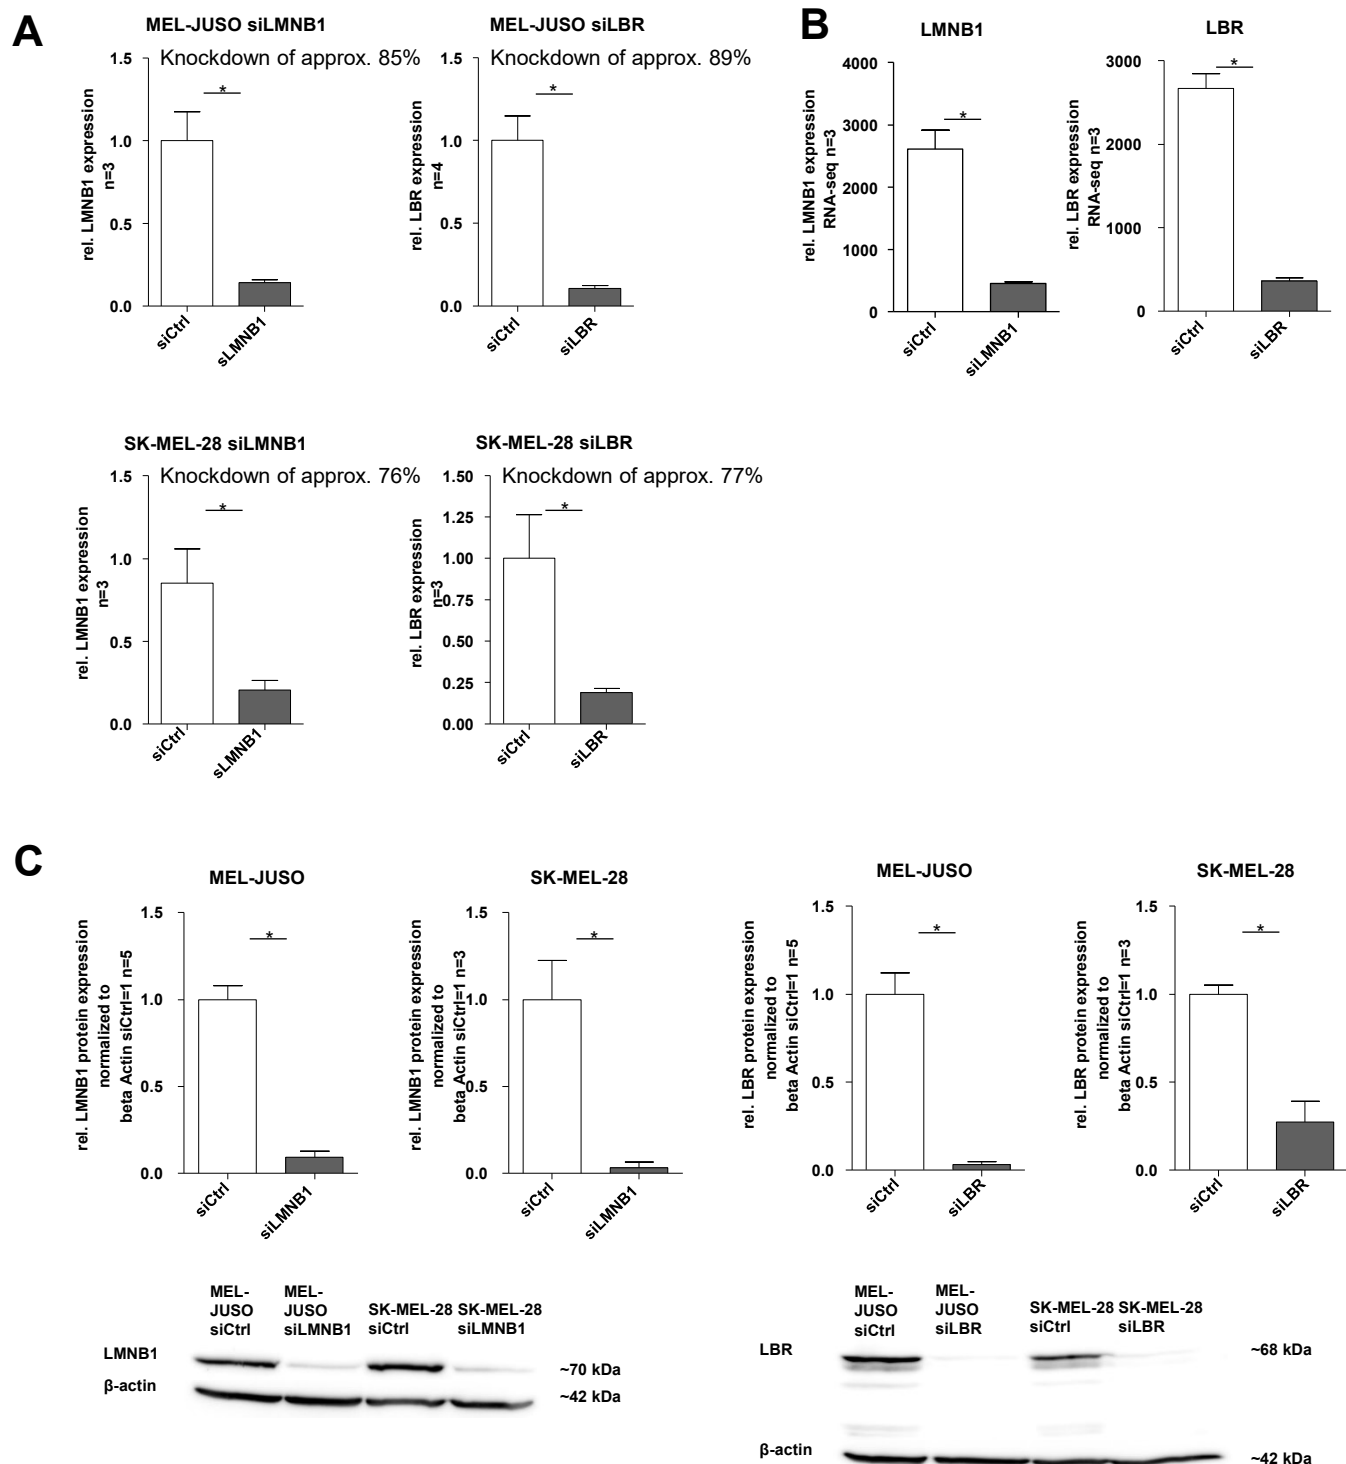

**Figure S3: (A)** Quantitative real-time PCR analysis of LMNB1 and LBR RNA expression in MEL-JUSO and SK-MEL-28 treated with siLMNB1 and siLBR for 72 h. Bars represent mean+SEM, (statistical significance was calculated using t-test with  $\Delta$ CP values indicated as \* =  $p \leq 0.05$ ). **(B)** RNA-sequencing analysis in primary melanoma cells (MEL-JUSO) treated with siCtrl, siLMNB1 or siLBR. LMNB1 and LBR expression compared to siCtrl for knockdown verification. Bars represent mean+SEM, (statistical significance was calculated using t-Test with  $\Delta$ CP values indicated as \* =  $p \leq 0.05$ ). **(C)** Western Blot analysis of LMNB1 and LBR protein expression in MEL-JUSO and SK-MEL-28 treated with siLMNB1 and siLBR for 72 h. Bars represent mean+SEM, (statistical significance was calculated using t-test with  $\Delta$ CP values indicated as \* =  $p \leq 0.05$ ).
